# Supplementary material for: Causal Effects of Gut Microbiota on Age-Related Macular Degeneration: A Mendelian Randomization Study
Source: PubMed Central journal article supplement (PMC10513115; doi:10.1167/iovs.64.12.32), 2023-09-19

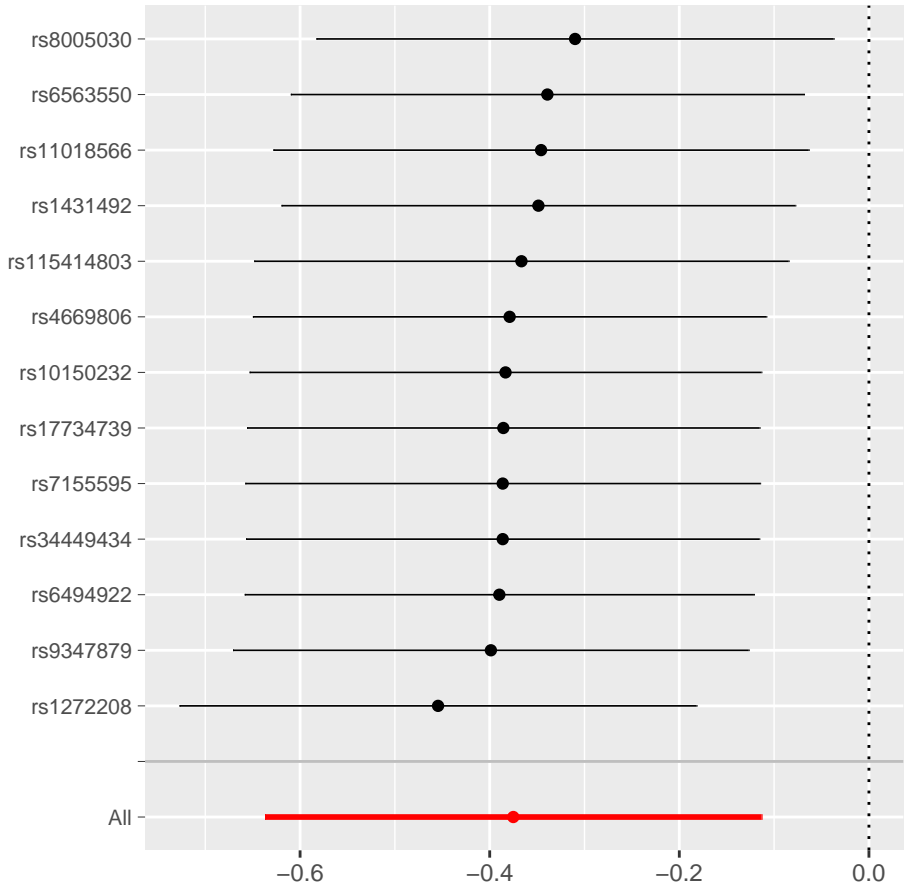

MR leave-one-out sensitivity analysis for

' || id:ebi-a-GCST90016967' on 'Age-related macular degeneration (whether dry or wet)' || id:finn

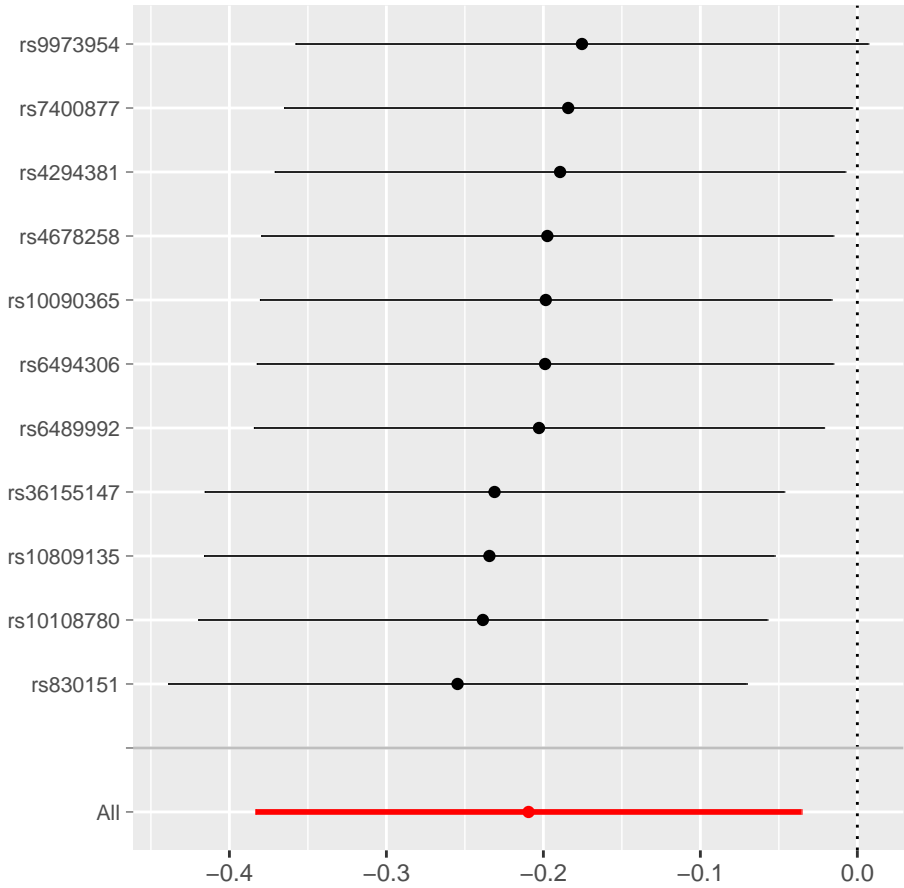

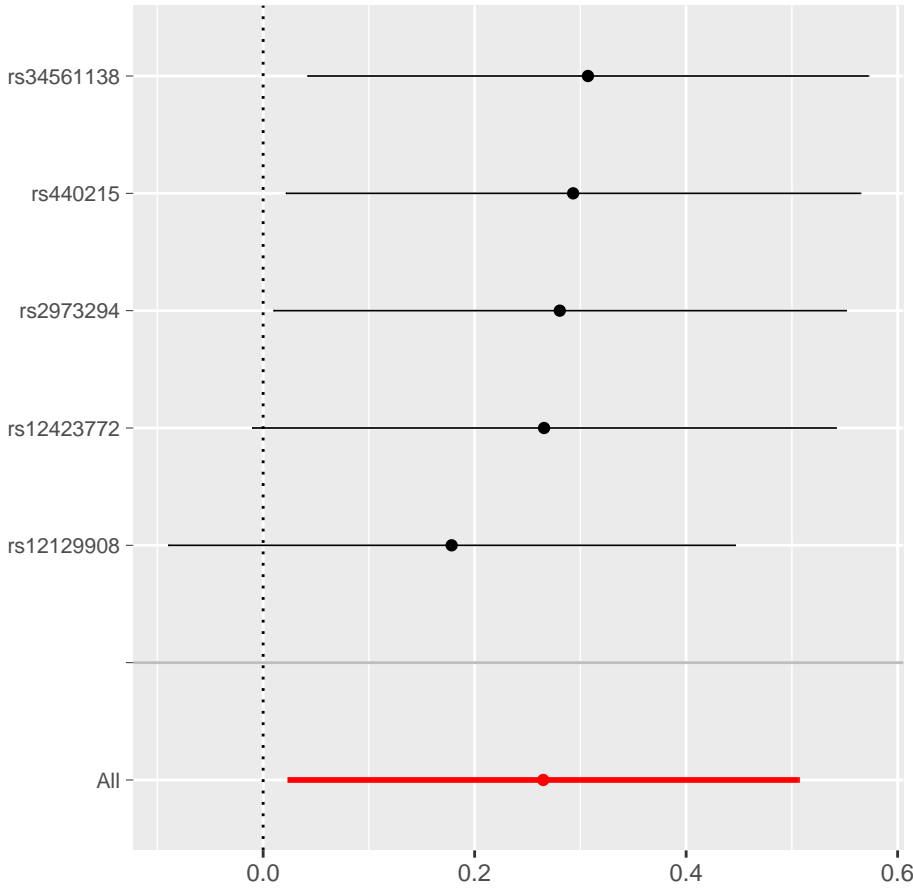

MR leave-one-out sensitivity analysis for

' || id:ebi-a-GCST90017002' on 'Age-related macular degeneration (whether dry or wet) || id:finn-

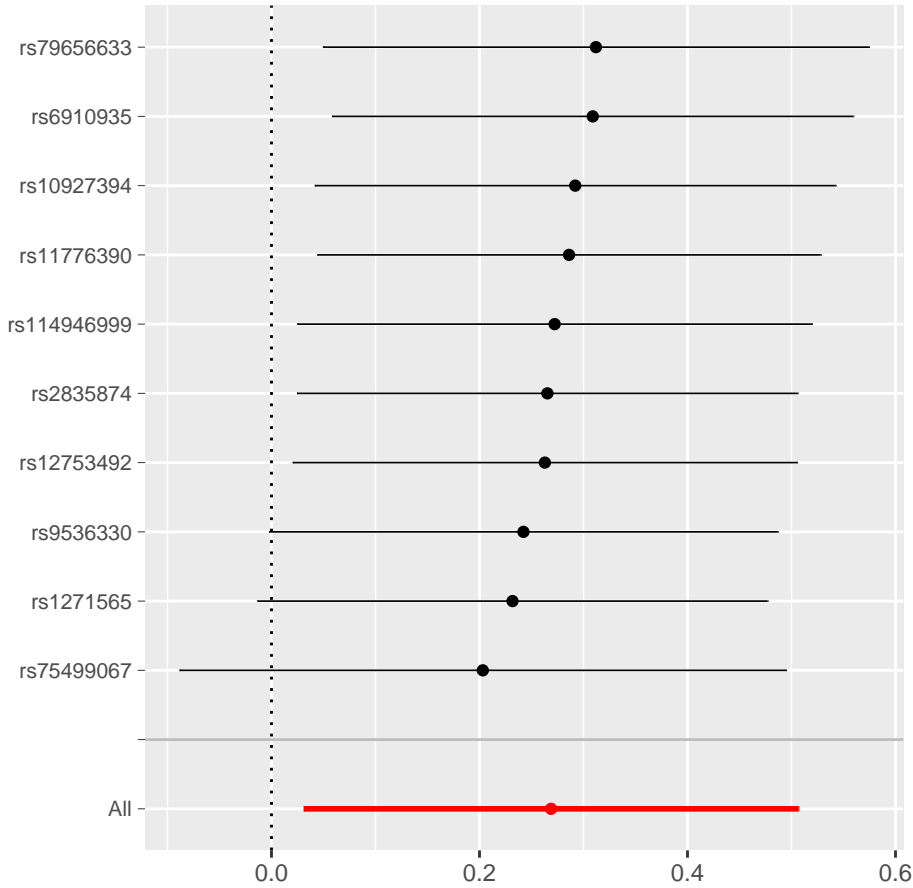

MR leave-one-out sensitivity analysis for 'Age-related macular degeneration (whether dry or wet) || id:ebi-a-GCST90017007' on 'Age-related macular degeneration (whether dry or wet) || id:finn'

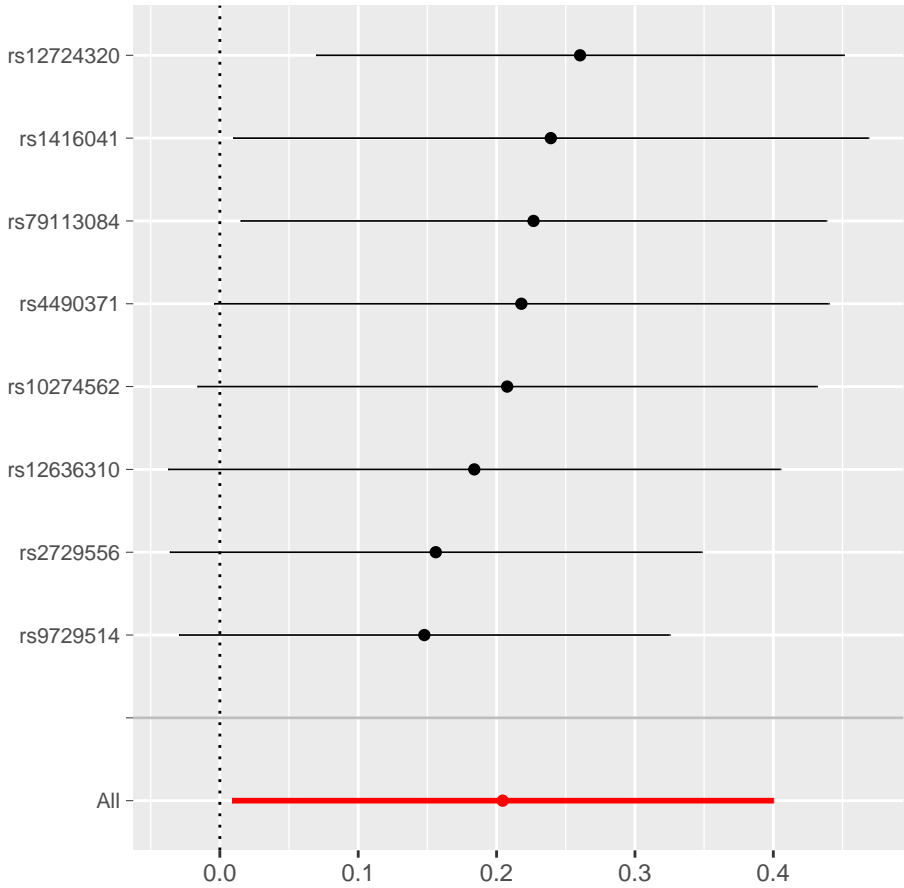

MR leave-one-out sensitivity analysis for

' || id:ebi-a-GCST90017059' on 'Age-related macular degeneration (whether dry or wet)' || id:fin-

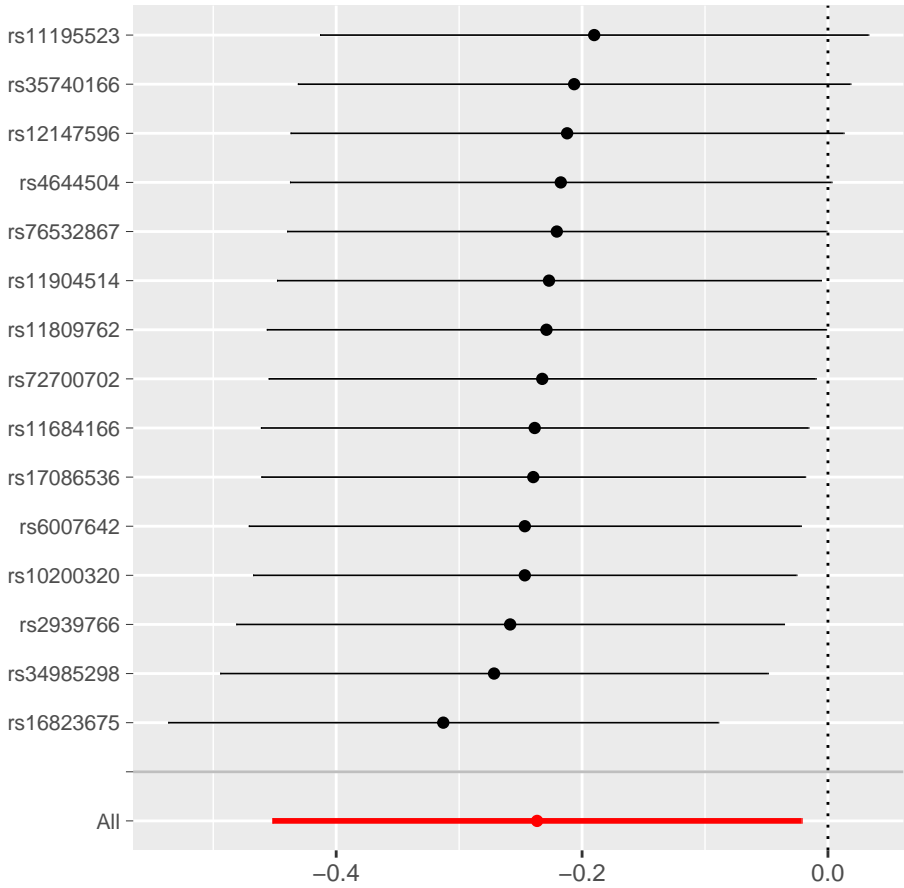

Supplement: iovs-64-12-32_s001.pdf [file iovs-64-12-32_s001.pdf]
